# Supplementary material for: Assessing Public Engagement with Science in a University Primate Research Centre in a National Zoo
Source: PubMed Central journal article supplement (PMC3319593; doi:10.1371/journal.pone.0034505), 2012-04-04
Supplement: pone.0034505.s001.pdf [file pone.0034505.s001.pdf]

Table S1.

| <b>Information boards, videos and interactive computer displays</b> |                                     |                   |                                                                                         |                       |
|---------------------------------------------------------------------|-------------------------------------|-------------------|-----------------------------------------------------------------------------------------|-----------------------|
| <b>Location Code</b>                                                | <b>Name</b>                         | <b>Type</b>       | <b>Description</b>                                                                      | <b>Date Installed</b> |
| a,z                                                                 | Living together                     | Information board | Explaining that the squirrel monkeys and capuchin monkeys live in a mixed species group | From opening          |
| b,w                                                                 | Map                                 | Information board | A map of the Living Links (2 versions west and east)                                    | From opening          |
| c,x                                                                 | Living Links Research Centre        | Information board | General background information on the centre                                            | From opening          |
| d,y                                                                 | The Scottish Primate Research Group | Information board | Introducing the Scottish Primate Research Group                                         | From opening          |
| e                                                                   | Opening plaque                      | Plaque            | A plaque commemorating the opening of Living Links by Jane Goodall                      | From opening          |
| f,u                                                                 | Research Room                       | Information board | Explaining the purpose and function of the research rooms                               | From opening          |
| g,v                                                                 | Current Research                    | Notice board      | Short descriptions of current research activities taking part in the research rooms     | From opening          |
| h                                                                   | Seeing double                       | Information board | Explaining Living Link's 'mirror-image' design for research (2 versions west and east)  | From opening          |
| i                                                                   | Notice board                        | Notice board      | Used for instructions and explanations for research activities running at Living Links  | From opening          |
| j                                                                   | Notice board                        | Notice board      | Clippings of recent Living Links news items from the popular press                      | From opening          |

|   |                   |                               |                                                                                                                                                                  |              |
|---|-------------------|-------------------------------|------------------------------------------------------------------------------------------------------------------------------------------------------------------|--------------|
| k | Grammar           | Information board             | Grammar in primates, based around SPRG research on communication in primates                                                                                     | From opening |
| l | Meaning           | Information board             | Based on SPRG research on communication in primates (accompanies 's')                                                                                            | From opening |
| m | Language          | Information board             | Language in primates, based around SPRG research on communication in primates                                                                                    | From opening |
| n | Notice board      | Information board             | Used in 2009 to display profiles of the main people working at Living Links, and in 2010 for details of current research in progress outside the research rooms. | From opening |
| o | Evolutionary Tree | Information board             | Diagram of the 'tree' of Old world primates, including humans                                                                                                    | From opening |
| p | Notice board      | Notice board                  | ('Who's who' at living links and current research notices)                                                                                                       | From opening |
| q | Interactive 1     | 'Interactive'                 | A computer screen and microphone producing sonograms of visitors voices and challenging them to reproduce primate calls                                          | From opening |
| r | Interactive 2     | 'Interactive' game or display | A touch screen quiz about chimpanzee communication                                                                                                               | From opening |
| s | Interactive 3 –   | 'Interactive' game or display | Six buttons producing monkey alarm calls for various predators with photographs and captions (accompanies 'l')                                                   | From opening |
| t | Brown capuchins   | Information board             | General information about capuchin monkeys and their use of tools                                                                                                | From opening |

|       |                     |                               |                                                                                                                                                                                                                                                                          |                                   |
|-------|---------------------|-------------------------------|--------------------------------------------------------------------------------------------------------------------------------------------------------------------------------------------------------------------------------------------------------------------------|-----------------------------------|
| vid   | Video               | AV projector                  | <u>West</u><br>Running powerpoint slides from opening until 29-8-09 when replaced by videos on a loop until 2-12-09 when a touch sensitive menu was on the window to select from various new films                                                                       | From opening                      |
|       |                     |                               | <u>East</u><br>Running the most important videos on a loop explaining the purpose of living links                                                                                                                                                                        | 2-12-09                           |
| id    | ID boards           | Information board             | A total of eight 'identification boards' of four different designs (east and west capuchins and squirrel monkeys) hanging from cables at a low level to encourage handling and use to identify individual monkeys in the enclosures                                      | 17-10-09                          |
| aa    | Primate family tree | 'Interactive' game or display | An interactive 'primate family tree' using a cursor controlled by a rollerball                                                                                                                                                                                           | 19-04-10                          |
| bb    | Research Training   | 'Interactive' game or display | An interactive quiz challenging visitors to identify Linking Link's capuchin monkeys using a cursor controlled by a rollerball                                                                                                                                           | 19-04-10                          |
| cc,dd | Panpipes            | 'Interactive' game or display | A pair of 'puzzle boxes' originally used in experiments on social learning in chimpanzees (Whiten et al. 2005) and adapted for use by the public. The two puzzle boxes are identical, but each has a small video screen showing a different method of solving the puzzle | 27-7-10<br>(screens added 2-8-10) |

|    |                              |                   |                                                                                                       |          |
|----|------------------------------|-------------------|-------------------------------------------------------------------------------------------------------|----------|
| ee | How to speak squirrel monkey | Information board | Photos and short descriptions of visual displays and communication in squirrel monkeys                | 21-11-09 |
| ff | Rainforests                  | Information board | Explaining the design of the outdoor enclosures of Living Links, based on the monkeys natural habitat | 21-11-09 |
| gg | How to speak capuchin        | Information board | Photos and short descriptions of visual displays and communication in capuchin monkeys                | 21-11-09 |
